# Supplementary material
Source: publisher figshare collection journal article supplement (https://springernature.figshare.com/ndownloader/files/22104876)
Supplement: Supplementary file [file 22104876]

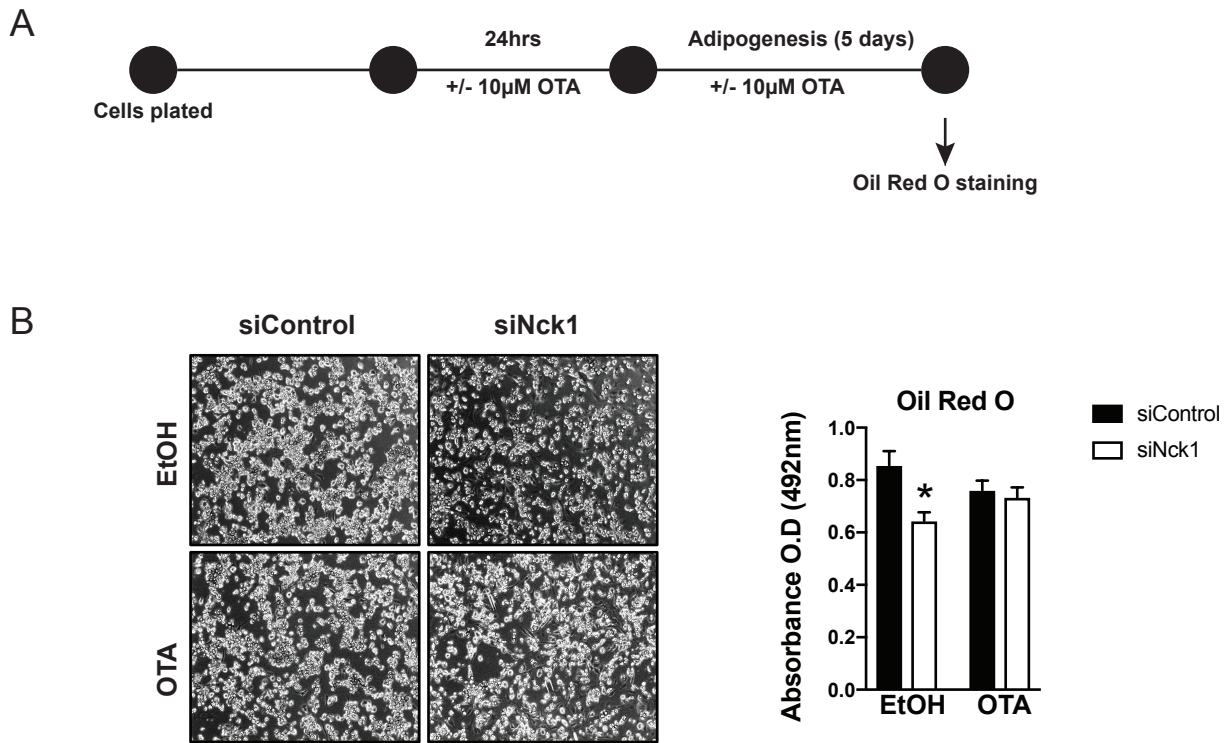

**Figure S5. Inhibition of Nrf2 prevents the effects of Nck1 deletion on adipogenesis in mesenchymal stem cells.** (A) Experimental design. (B) Representative images (DIC, 10X) and Oil red O staining quantification in OTA (10µM) or DMSO treated differentiated (Day 5) siControl and siNck1 C3H10T1/2 cells (n=3/group). Data are mean  $\pm$  SEM. Statistical significance evaluated by unpaired Student's t-test is reported as \* $p \leq 0.05$ .
